# Supplementary material for: GRID-seq reveals the global RNA–chromatin interactome
Source: Springer Nature journal article supplement (doi:10.1038/nbt.3968), 2017-09-18
Supplement: 41587_2017_BFnbt3968_MOESM8_ESM.pdf [file 41587_2017_BFnbt3968_MOESM8_ESM.pdf]

## Life Sciences Reporting Summary

Nature Research wishes to improve the reproducibility of the work that we publish. This form is intended for publication with all accepted life science papers and provides structure for consistency and transparency in reporting. Every life science submission will use this form; some list items might not apply to an individual manuscript, but all fields must be completed for clarity.

For further information on the points included in this form, see [Reporting Life Sciences Research](#). For further information on Nature Research policies, including our [data availability policy](#), see [Authors & Referees](#) and the [Editorial Policy Checklist](#).

## ▶ Experimental design

## 1. Sample size

Describe how sample size was determined.

Not applicable

## 2. Data exclusions

Describe any data exclusions.

Not applicable

## 3. Replication

Describe whether the experimental findings were reliably reproduced.

Yes. All GRID-seq experiments were performed in duplicates and the robust reproducibility were shown in Extended Data Fig.2e,f and Extended Data Fig.5a,b

## 4. Randomization

Describe how samples/organisms/participants were allocated into experimental groups.

Not applicable

## 5. Blinding

Describe whether the investigators were blinded to group allocation during data collection and/or analysis.

Not applicable

Note: all studies involving animals and/or human research participants must disclose whether blinding and randomization were used.

## 6. Statistical parameters

For all figures and tables that use statistical methods, confirm that the following items are present in relevant figure legends (or in the Methods section if additional space is needed).

- | n/a                                 | Confirmed                                                                                                                                                                                                                                |
|-------------------------------------|------------------------------------------------------------------------------------------------------------------------------------------------------------------------------------------------------------------------------------------|
| <input type="checkbox"/>            | <input checked="" type="checkbox"/> The <u>exact sample size</u> ( $n$ ) for each experimental group/condition, given as a discrete number and unit of measurement (animals, litters, cultures, etc.)                                    |
| <input checked="" type="checkbox"/> | <input type="checkbox"/> A description of how samples were collected, noting whether measurements were taken from distinct samples or whether the same sample was measured repeatedly                                                    |
| <input type="checkbox"/>            | <input checked="" type="checkbox"/> A statement indicating how many times each experiment was replicated                                                                                                                                 |
| <input type="checkbox"/>            | <input checked="" type="checkbox"/> The statistical test(s) used and whether they are one- or two-sided (note: only common tests should be described solely by name; more complex techniques should be described in the Methods section) |
| <input type="checkbox"/>            | <input checked="" type="checkbox"/> A description of any assumptions or corrections, such as an adjustment for multiple comparisons                                                                                                      |
| <input type="checkbox"/>            | <input checked="" type="checkbox"/> The test results (e.g. $P$ values) given as exact values whenever possible and with confidence intervals noted                                                                                       |
| <input type="checkbox"/>            | <input checked="" type="checkbox"/> A clear description of statistics including <u>central tendency</u> (e.g. median, mean) and <u>variation</u> (e.g. standard deviation, interquartile range)                                          |
| <input type="checkbox"/>            | <input checked="" type="checkbox"/> Clearly defined error bars                                                                                                                                                                           |

See the web collection on [statistics for biologists](#) for further resources and guidance.

## ▶ Software

Policy information about [availability of computer code](#)

## 7. Software

Describe the software used to analyze the data in this

Bowtie2 was used for aligning deep sequencing reads to genomes. Samtools and

study.

Bedtools suits were used to process aligned reads. Circos was used to generate circos plots. Cytoscape was used to visualize networks.

For manuscripts utilizing custom algorithms or software that are central to the paper but not yet described in the published literature, software must be made available to editors and reviewers upon request. We strongly encourage code deposition in a community repository (e.g. GitHub). *Nature Methods* [guidance for providing algorithms and software for publication](#) provides further information on this topic.

## ► Materials and reagents

Policy information about [availability of materials](#)

### 8. Materials availability

Indicate whether there are restrictions on availability of unique materials or if these materials are only available for distribution by a for-profit company.

Not applicable

### 9. Antibodies

Describe the antibodies used and how they were validated for use in the system under study (i.e. assay and species).

Not applicable

### 10. Eukaryotic cell lines

a. State the source of each eukaryotic cell line used.

MDA-MB-231 breast cancer cells purchased from ATCC (HTB-26); MM.1S cells gifted by Dr. Richard Young at MIT; S2 cells gifted by Dr. Steven Wasserman at UCSD; Mouse ES cells (C57BL/6) gifted by Dr. Bing Ren at UCSD

b. Describe the method of cell line authentication used.

Cell lines were checked for morphology by microscope, as recommended by ATCC

c. Report whether the cell lines were tested for mycoplasma contamination.

Mycoplasma was tested by Hoechst staining of the cells according to Young L. et al., *Nature Protocols*, 2010.

d. If any of the cell lines used are listed in the database of commonly misidentified cell lines maintained by [ICLAC](#), provide a scientific rationale for their use.

No. MDA-MB-231, MM.1S, S2 and Mouse ES (C57BL/6) cell lines are not listed in the database.

## ► Animals and human research participants

Policy information about [studies involving animals](#); when reporting animal research, follow the [ARRIVE guidelines](#)

### 11. Description of research animals

Provide details on animals and/or animal-derived materials used in the study.

Not applicable

Policy information about [studies involving human research participants](#)

### 12. Description of human research participants

Describe the covariate-relevant population characteristics of the human research participants.

Not applicable
